# Supplementary material for: The effects of drying technique and surface pre-treatment on the cytotoxicity and dissolution rate of luminescent porous silicon quantum dots in model fluids and living cells
Source: Royal Society of Chemistry journal article supplement (doi:10.1039/c9fd00107g), 2019-11-01
Supplement: c9fd00107g1.pdf [file c9fd00107g1.pdf]

## Supplementary information

### **The effects of drying technique and surface pre-treatment on the cytotoxicity and dissolution rate of luminescent porous silicon quantum dots in model fluids and living cells**

Maksim B. Gongalsky,<sup>a†</sup> Uliana A. Tsurikova,<sup>a†</sup> Catherine J. Storey,<sup>b</sup> Y.V. Evstratova,<sup>c</sup> Andrew A. Kudryavtsev,<sup>a,c</sup> Leigh T. Canham <sup>\*b</sup> and Liubov A. Osminkina <sup>\*a,d</sup>

<sup>a.</sup> Department of Physics, Lomonosov Moscow State University, Leninskie Gory 1, 119991 Moscow, Russian Federation.

<sup>b.</sup> Nanoscale Physics, Chemistry, and Engineering Research Laboratory, University of Birmingham, Birmingham B15 2TT, U.K.

<sup>c.</sup> Institute of Theoretical and Experimental Biophysics, Russian Academy of Science, 142290 Pushchino, Moscow Region, Russian Federation.

<sup>d.</sup> Institute for Biological Instrumentation of Russian Academy of Sciences, 142290 Pushchino, Moscow Region, Russian Federation.

† Equally contributed authors.

Corresponding Authors:

\*Email: l.t.canham@bham.ac.uk (L.T.C.).

\*Email: osminkina@physics.msu.ru (L.A.O.).

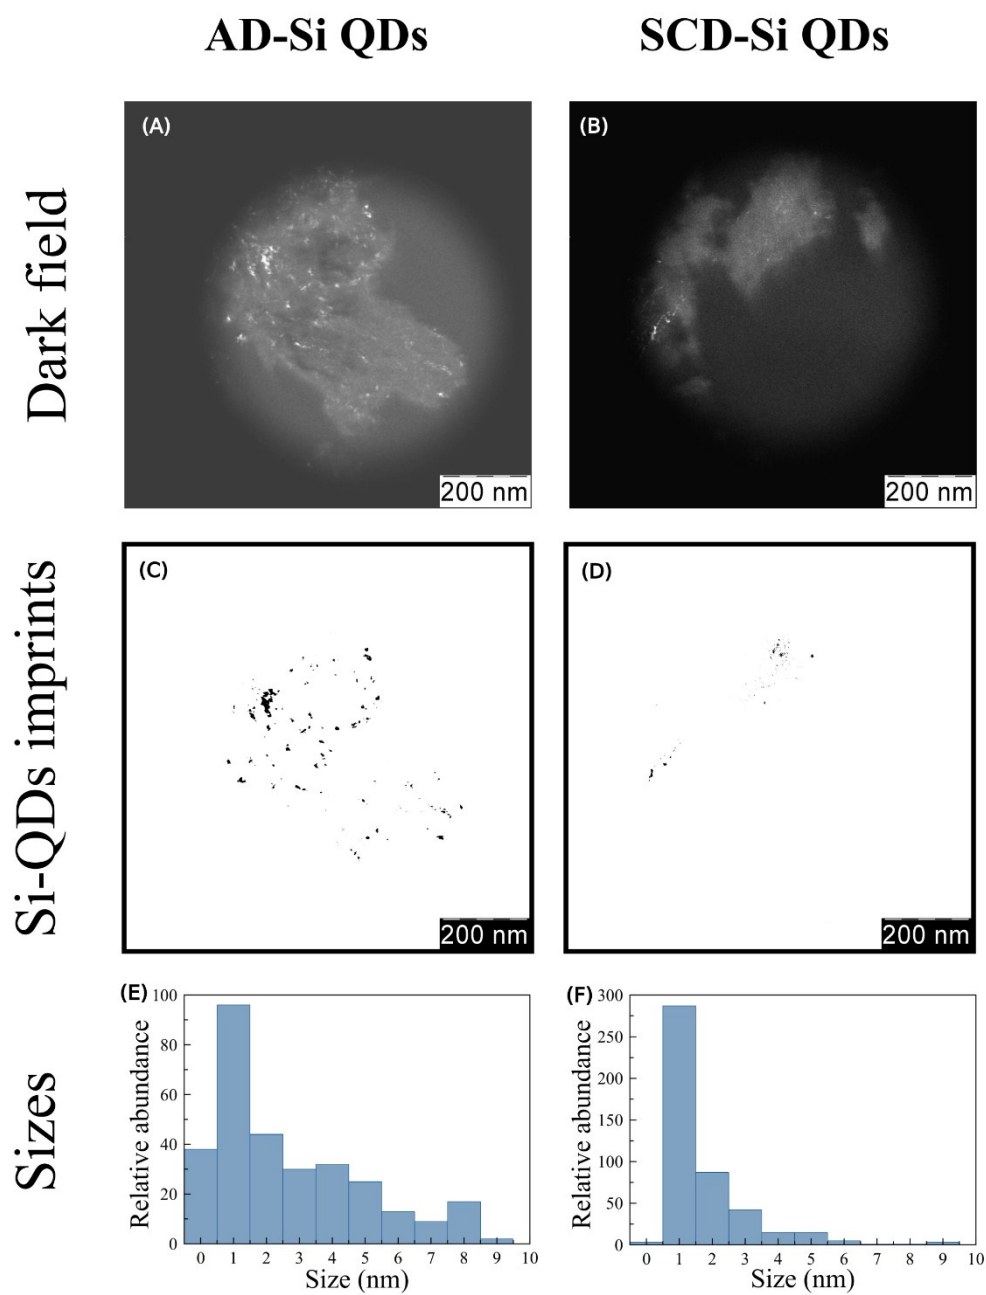

**Fig. S1** Enhanced contrast dark-field TEM image of (A) AD-Si QDs and (B) SCD-Si QDs, used for calculation of the silicon nanocrystal distribution. (C), (D) the corresponding contours of the white spots are presented, used to calculate the size distribution. Size distribution of (E) AD-Si QDs and (F) SCD-Si QDs obtained from the dark-field TEM image.

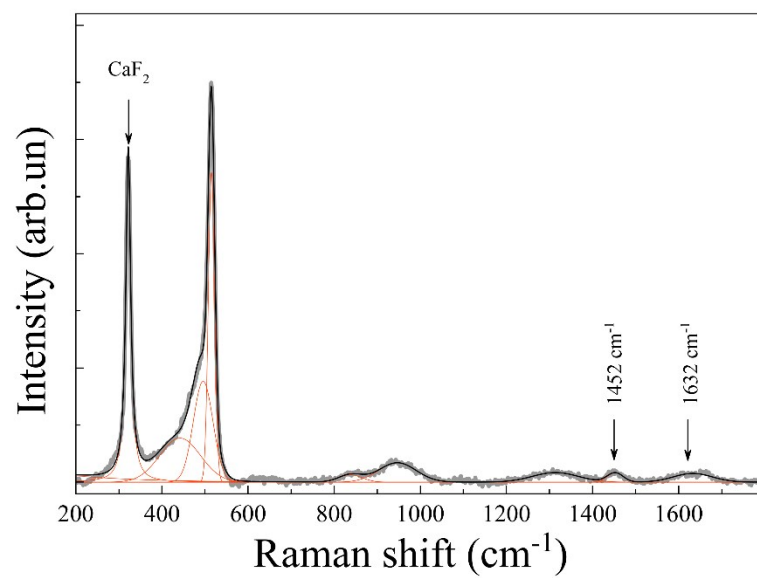

**Fig. S2** Raman spectrum of 3T3 NIH cell incubated with AD-Si QDs for 9 hours.
